# Supplementary material
Source: PubMed Central journal article supplement (PMC6622423)
Supplement: ASN.2018101036SupplementaryData1.pdf [file ASN.2018101036SupplementaryData1.pdf]

## **SUPPLEMENTARY MATERIAL TABLE OF CONTENTS**

**Supplementary Table 1. Multivariable association between AKI and change in level of urine PCR, full model and analyses that exclude receipt of ACE-I/ARB or systolic blood pressure level**

**Supplementary Table 2. Multivariable association between AKI and change in level of urine PCR using an AKI vs. matched non-AKI episode modeling approach (i.e. comparing only single pair of pre- and post- study visits urine PCR), full model and analyses that exclude receipt of ACE-I/ARB or systolic blood pressure level**

**Supplementary Table 3. Distributions of absolute levels of urine protein/creatinine ratio (in units of g/g) at two consecutive study visits with and without intervening AKI.**

**Supplementary Table 1. Multivariable association between AKI and change in level of urine PCR, full model and analyses that exclude receipt of ACE-I/ARB or systolic blood pressure level**

| Predictors in mixed effects model                | Full Model                     |             | Model excluding receipt of ACE-I/ARB |             | Model excluding systolic blood pressure level |             |
|--------------------------------------------------|--------------------------------|-------------|--------------------------------------|-------------|-----------------------------------------------|-------------|
|                                                  | Relative risk (95% CI)         | P           | Relative risk (95% CI)               | P           | Relative risk (95% CI)                        | P           |
| <b>AKI between study visits (vs. no AKI)*</b>    | <b>1.090 ( 1.021 to 1.163)</b> | <b>0.01</b> | <b>1.093 ( 1.024 to 1.166)</b>       | <b>0.01</b> | <b>1.071 ( 1.003 to 1.144)</b>                | <b>0.04</b> |
| eGFR (per 1 ml/min/1.73m <sup>2</sup> increase)* | 0.997 (0.996 to 0.998)         | <0.001      | 0.997 (0.996 to 0.998)               | <0.001      | 0.999 (0.998 to 1.000)                        | 0.01        |
| Systolic blood pressure (per 1 mmHg increase)*   | 1.010 ( 1.009 to 1.010)        | <0.001      | 1.010 ( 1.009 to 1.011)              | <0.001      |                                               |             |
| Receipt of ACE-I/ARB*                            | 0.842 (0.798 to 0.888)         | <0.001      |                                      |             | 0.831 (0.786 to 0.878)                        | <0.001      |
| Antihypertensive medication use*                 | 1.042 ( 1.008 to 1.077)        | 0.02        | 1.030 (0.996 to 1.064)               | 0.08        | 1.026 (0.992 to 1.062)                        | 0.13        |
| Diabetes mellitus (vs. no diabetes) *            | 1.470 ( 1.379 to 1.568)        | <0.001      | 1.450 ( 1.359 to 1.546)              | <0.001      | 1.486 ( 1.390 to 1.588)                       | <0.001      |
| Age (per 1 year increase)*                       | 1.014 ( 1.012 to 1.017)        | <0.001      | 1.014 ( 1.012 to 1.017)              | <0.001      | 1.020 ( 1.017 to 1.023)                       | <0.001      |
| Black race (vs. non-black)                       | 1.311 ( 1.160 to 1.483)        | <0.001      | 1.284 ( 1.136 to 1.451)              | <0.001      | 1.432 ( 1.259 to 1.628)                       | <0.001      |
| Female (vs. male)                                | 1.009 (0.919 to 1.108)         | 0.85        | 1.034 (0.942 to 1.135)               | 0.48        | 0.977 (0.885 to 1.077)                        | 0.64        |
| ASSESS-AKI participant (vs. CRIC participant)    | 1.050 (0.937 to 1.177)         | 0.40        | 1.093 (0.976 to 1.224)               | 0.12        | 1.039 (0.922 to 1.172)                        | 0.53        |

\*Time-updated predictors

**Supplementary Table 2. Multivariable association between AKI and change in level of urine PCR using an AKI vs. matched non-AKI episode modeling approach (i.e. comparing only single pair of pre- and post- study visits urine PCR), full model and analyses that exclude receipt of ACE-I/ARB or systolic blood pressure level**

| Predictors in mixed effects model                | Full Model                     |             | Model excluding receipt of ACE-I/ARB |             | Model excluding systolic blood pressure level |        |
|--------------------------------------------------|--------------------------------|-------------|--------------------------------------|-------------|-----------------------------------------------|--------|
|                                                  | Relative risk (95% CI)         | P           | Relative risk (95% CI)               | P           | Relative risk (95% CI)                        | P      |
| <b>AKI between study visits (vs. no AKI)*</b>    | <b>1.107 ( 1.017 to 1.205)</b> | <b>0.02</b> | <b>1.108 ( 1.018 to 1.206)</b>       | <b>0.02</b> | <b>1.079 (0.989 to 1.178)</b>                 | 0.09   |
| eGFR (per 1 ml/min/1.73m <sup>2</sup> increase)* | 0.988 (0.986 to 0.991)         | <0.001      | 0.989 (0.986 to 0.991)               | <0.001      | 0.990 (0.987 to 0.993)                        | <0.001 |
| Systolic blood pressure (per 1 mmHg increase)*   | 1.011 ( 1.009 to 1.014)        | <0.001      | 1.011 ( 1.009 to 1.014)              | <0.001      |                                               |        |
| Receipt of ACE-I/ARB*                            | 0.906 (0.777 to 1.058)         | 0.21        |                                      |             | 0.903 (0.770 to 1.059)                        | 0.21   |
| Antihypertensive medication use*                 | 1.122 ( 1.009 to 1.248)        | 0.03        | 1.114 ( 1.002 to 1.238)              | 0.05        | 1.113 (0.997 to 1.242)                        | 0.06   |
| Diabetes mellitus (vs. no diabetes) *            | 1.790 ( 1.530 to 2.096)        | <0.001      | 1.762 ( 1.508 to 2.059)              | <0.001      | 1.880 ( 1.598 to 2.210)                       | <0.001 |
| Age (per 1 year increase)*                       | 0.986 (0.979 to 0.993)         | <0.001      | 0.986 (0.979 to 0.993)               | <0.001      | 0.990 (0.983 to 0.998)                        | 0.01   |
| Black race (vs. non-black)                       | 0.933 (0.749 to 1.162)         | 0.54        | 0.923 (0.741 to 1.149)               | 0.47        | 1.053 (0.841 to 1.318)                        | 0.65   |
| Female (vs. male)                                | 0.920 (0.776 to 1.090)         | 0.33        | 0.935 (0.790 to 1.106)               | 0.43        | 0.891 (0.748 to 1.061)                        | 0.19   |
| ASSESS-AKI participant (vs. CRIC participant)    | 1.259 ( 1.016 to 1.562)        | 0.04        | 1.289 ( 1.042 to 1.594)              | 0.02        | 1.261 ( 1.010 to 1.574)                       | 0.04   |

\*Time-updated predictors

**Supplementary Table 3. Distributions of absolute levels of urine protein/creatinine ratio (in units of g/g) at two consecutive study visits with and without intervening AKI.**

|                                      | Median (IQR) urine proteinuria/creatinine level from earlier study visit | Intervening AKI | Median (IQR) urine proteinuria/creatinine level from subsequent study visit |
|--------------------------------------|--------------------------------------------------------------------------|-----------------|-----------------------------------------------------------------------------|
| Matched AKI participants (N=324)     | 0.18 (0.10-0.49) (g/g)                                                   | Yes             | 0.20 (0.10-0.53) (g/g)                                                      |
| Matched non-AKI participants (N=324) | 0.12 (0.07-0.24) (g/g)                                                   | No              | 0.11 (0.07-0.24) (g/g)                                                      |
